# Supplementary material
Source: HighWire-hosted journal article supplement (https://bmjopen.bmj.com/content/15/4/e096158)
Supplement: inline-supplementary-material-1 [file inline-supplementary-material-1.pdf]

| Maternal sociodemographic and obstetric characteristics |                    |                                                                           |
|---------------------------------------------------------|--------------------|---------------------------------------------------------------------------|
| 101                                                     | Age of the mother  | -----                                                                     |
| 102                                                     | Residency          | 1. Urban<br>2. Rural                                                      |
| 103                                                     | Parity             | -----                                                                     |
| 104                                                     | Place of delivery  | 1. Health center<br>2. Hospital                                           |
| 105                                                     | Current pregnancy  | 1. Single<br>2. Multiple                                                  |
| 106                                                     | ANC                | -----                                                                     |
| 107                                                     | Mode of delivery   | 1. Spontaneous vaginal<br>2. Instrumental assisted<br>3. Cesarean section |
| 108                                                     | Duration of labour | -----                                                                     |
| 109                                                     | Gestational DM     | 1. Yes<br>2. No                                                           |
| Neonatal socio demography and comorbidities             |                    |                                                                           |
| 201                                                     | Sex                | 1. Male<br>2. Female                                                      |
| 202                                                     | Gestational age    | ----- in week                                                             |
| 203                                                     | Birth weight       | ----- in gram                                                             |
| 204                                                     | Feeding            | 1. 48-72 hr<br>2. After 72 hr                                             |
| 205                                                     | Meningitis         | 1. Yes<br>2. No                                                           |
| 206                                                     | MAS                | 1. Yes<br>2. No                                                           |
| 207                                                     | Weight for age     | 1. AGA                                                                    |

|                   |                              |                                        |
|-------------------|------------------------------|----------------------------------------|
|                   |                              | 2. SGA<br>3. LGA                       |
| 208               | HIE                          | 1. Stage 1<br>2. Stage 2<br>3. Stage 3 |
| 209               | Length of stay               | -----                                  |
| Outcome variables |                              |                                        |
| 301               | Count number of hypoglycemia | -----                                  |

**N.B. Those variables hyperinsulinemia, sepsis, parenteral feeding and temperature were modified during the pilot study before data collection.**
